# Supplementary material
Source: publisher site journal article supplement (https://www.dovepress.com/article/350890)
Supplement: Supplementary file 1 [file get_supplementary_file.php]

**Appendix 1:** Search strategy example, data extraction instrument, and studies ineligible following full-text review

**Search strategy example**

Search conducted in PubMed on 8-1-2020.

*("Parkinson Disease"[Mesh] OR parkinson[Text Word] OR parkinson's[Text Word] OR parkinsons[Text Word]) AND ("fear"[Mesh] OR "fear of falling" OR falling[Text Word] OR restriction[Text Word] OR "activity restriction") AND (avoid*[Text Word] OR "avoidance behavior" OR "activity avoidance" OR “avoidance motivation”[Text Word] OR refrain* OR self-efficacy[Text Word] OR "balance confidence" OR fall efficacy[Text Word])* – 88 hits returned.

**Data extraction instrument**

| **Scoping Review Details** |
| --- |
| Scoping Review title: |
| Review objective/s: |
| Review question/s: |
| **Study Information Related to Inclusion/Exclusion Criteria** |
| Population |
| Concept |
| Context |
| Types of evidence source |
| Type of study |
| Methodology |
| **Evidence source Details and Characteristics** |
| Citation details (e.g., author/s, date, title, journal, volume, issue, pages) |
| Country |
| Context |
| Participants |
| Key findings |
| **Details/Results extracted from the source of evidence** (in relation to the concept of the scoping review) |
| E.g., Details about measurements/assessments used for fear of falling activity avoidance behavior |
| E.g., Details about intervention methods used to address fear of falling activity avoidance behavior |

**Studies ineligible following full-text review**

1. Urell C, Zetterberg, L, Hellstrom K, Anens E. Factors explaining physical activity level in Parkinson’s disease: A gender focus. *Physiother Theory and Pract.* 2019; 37(4):507-516.

*Reason for exclusion:* Did not include activity avoidance behavior.

1. Stina J, Ullen S, Iwarsson S, Lexell J, Nilsson M. Concerns about falling in Parkinson’s disease: Association with disabilities and personal and environmental factors. *J Parkinsons Dis.* 2015; 5(2), 341-349.

*Reason for exclusion:* Did not include activity avoidance behavior.

1. Mehdizadeh M, Martinez-Martin P, Habibi S, Niikbakht N, Alvandi F, Bazipoor P, Panahi A, Taghizadeh G. The association of balance, fear of falling, and daily activities with drug phases and severity of disease in patients with Parkinson. *Basic Clin Neurosci.* 2019; 10(4), 355-362.

*Reason for exclusion:* Did not include activity avoidance behavior.

1. Jonasson S, Nilsson M, Lexell J. Psychometric properties of the original and short versions of the Falls Efficacy Scale – International (FES-I) in people with Parkinson’s disease. *Health Qual Life Outcomes.* 2017;15(1), 116.

*Reason for exclusion:* Did not include activity avoidance behavior.

1. Bryant M, Rintala D, Hou H, Protas E. Influence of fear of falling on gait and balance in Parkinson’s disease. *Disabil Rehabil.* 2014;36(9), 744-748.

*Reason for exclusion:* Did not include activity avoidance behavior.

1. Landers M, Durand C, Powell D, Dibble L, Young D. Development of a scale to assess avoidance behavior due to fear of falling: The fear of falling avoidance behavior questionnaire. *Phys Ther.* 2011; 91(8), 1253-1265.

*Reason for exclusion:* Unable to extract data for participants with Parkinson’s disease.
